# Supplementary material for: Molecularly Imprinted Polymer-Amyloid Fibril-Based Electrochemical Biosensor for Ultrasensitive Detection of Tryptophan
Source: MDPI journal article supplement (doi:10.3390/bios12050291), 2022-05-02
Supplement: s1 [file s1]

Supporting Materials

# Molecularly Imprinted Polymer-Amyloid Fibril-Based Electrochemical Biosensor for Ultrasensitive Detection of Tryptophan

Ibrar Alam <sup>1</sup>, Benchaporn Lertanantawong <sup>2</sup>, Thana Sutthibutpong <sup>3,4,5</sup>, Primana Punnakitkashem <sup>6,7</sup> and Piyapong Asanithi <sup>1,3,4,5,\*</sup>

- <sup>1</sup> Nanoscience and Nanotechnology, Faculty of Science, King Mongkut's University of Technology Thonburi, Bangkok 10140, Thailand; [ibrar.alam@mail.kmutt.ac.th](mailto:ibrar.alam@mail.kmutt.ac.th)
- <sup>2</sup> Department of Biomedical Engineering, Faculty of Engineering, Mahidol University, Salaya, Nakorn, Pathom 73170, Thailand; [benchaporn.ler@mahidol.ac.th](mailto:benchaporn.ler@mahidol.ac.th)
- <sup>3</sup> Department of Physics, Faculty of Science, King Mongkut's University of Technology Thonburi, Bangkok 10140, Thailand; [thana.sut@mail.kmutt.ac.th](mailto:thana.sut@mail.kmutt.ac.th)
- <sup>4</sup> ThEP Center, Commission of Higher Education, 328 Si Ayuthaya Rdad, Bangkok 10400, Thailand
- <sup>5</sup> Theoretical and Computational Science Center (TaCS), Science Laboratory Building, Faculty of Science, King Mongkut's University of Technology Thonburi, Bangkok 10140, Thailand
- <sup>6</sup> Siriraj Center of Research Excellence in Thera-nostic Nanomedicine, Faculty of Medicine, Siriraj Hospital, Mahidol University, Bangkok 10700, Thailand; [primana.pun@mahidol.ac.th](mailto:primana.pun@mahidol.ac.th)
- <sup>7</sup> Department of Biochemistry, Faculty of Medicine, Siriraj Hospital, Mahidol University, Bangkok 10700, Thailand
- \* Correspondence: [piyapong.asa@kmutt.ac.th](mailto:piyapong.asa@kmutt.ac.th)

## Material characterization:

### Preparation of PANI-no AF and PANI-AF

PANI was obtained by oxidizing 100 mM aniline with an aqueous solution of 10 mM iron (III)chloride in 10 mM HCl at room temperature. After 5 min of stirring, the solution was kept at room temperature overnight. PANI was recovered by filtration and washed several times with DI water. PANI-AF was produced in the same way as PANI-no AF but in the presence of 2 mM AF.

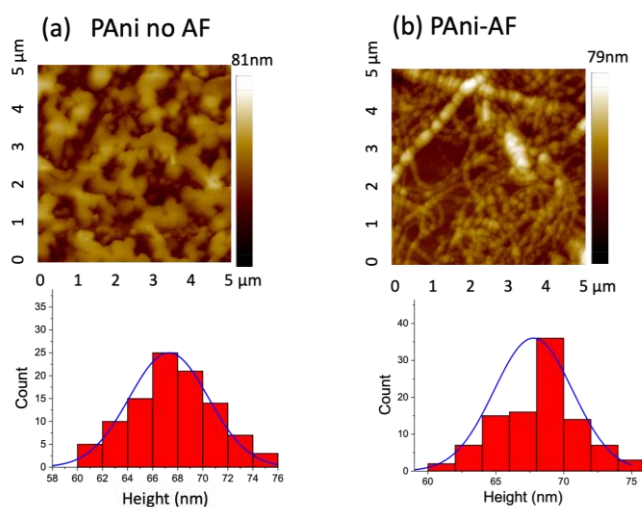

**Figure S1.** AFM for investigating the effect of AF on aniline polymerization. (a) Aniline polymerization without AF (PANI no AF) provides a cluster-like structure. (b) Aniline polymerization in the presence of AF (PANI-AF) clearly shows PANi -covered surface of AF.

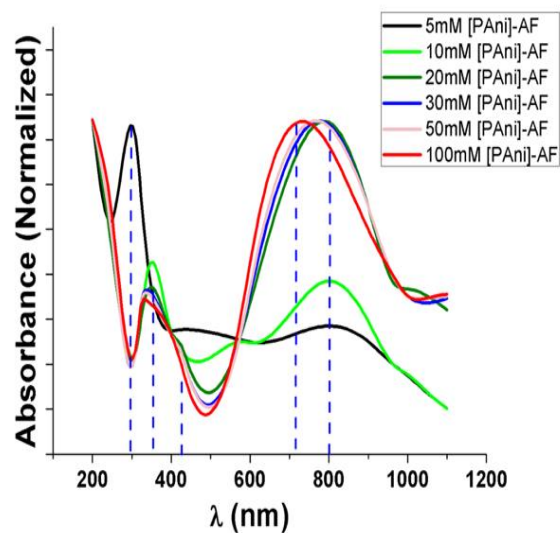

**Figure S2.** Determining the concentrations of aniline for polymerization around AF.

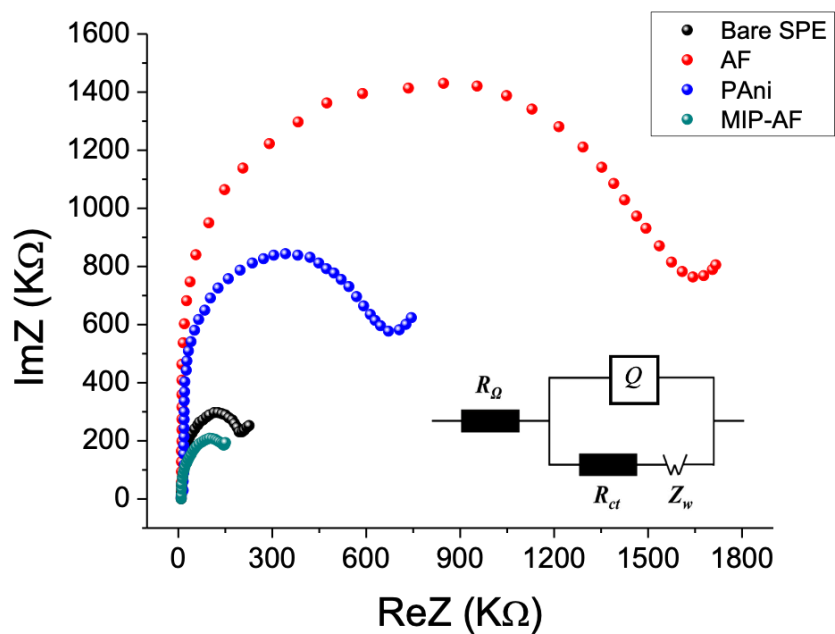

**Figure S3.** EIS Nyquist plot for characterizing MIP-AF development.
